# Supplementary material
Source: PubMed Central journal article supplement (PMC6312747)
Supplement: NIHMS996446-supplement-Supp_info.pdf [file NIHMS996446-supplement-Supp_info.pdf]

**Figure S1.** Sequence differences between ST and SR in transcripts. There is no relationship between differential expression between ST and SR and sequence differences between ST and SR. Percent sequence difference is calculated as the total number of differences divided by the length of the transcript times 100. Transcripts with significant differential expression are marked in red. All transcripts meeting the minimum coverage criteria for detecting sequence differences are shown here, including those with no sequence differences.

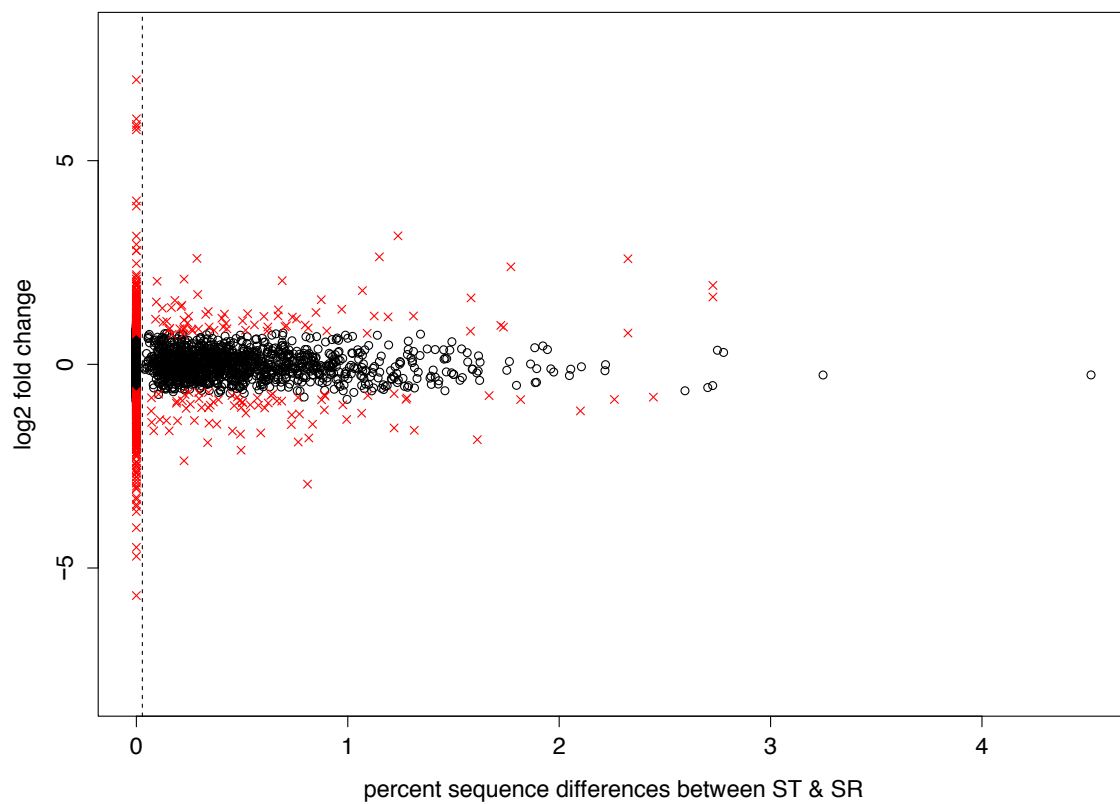

**Figure S2.** The transcripts that make up *X-importin-α2*. The *D. neotestacea* transcripts have been aligned to the *D. melanogaster importin-α2* sequence (Pen-PA), which is covered by the red CDS annotation arrow. TR7043 is the autosomal copy of *importin-α2*. TR37105, TR2814, and TR10603 from the combined transcriptome assembly make up the majority of *X-importin-α2*. The end of the transcript has been extracted from both an SR only transcriptome assembly and an ST only transcriptome assembly. A single large transcript covering the end of the transcript and the 3' UTR in the SR only assembly, and two overlapping transcripts covering the same distance were pulled from the ST only assembly.

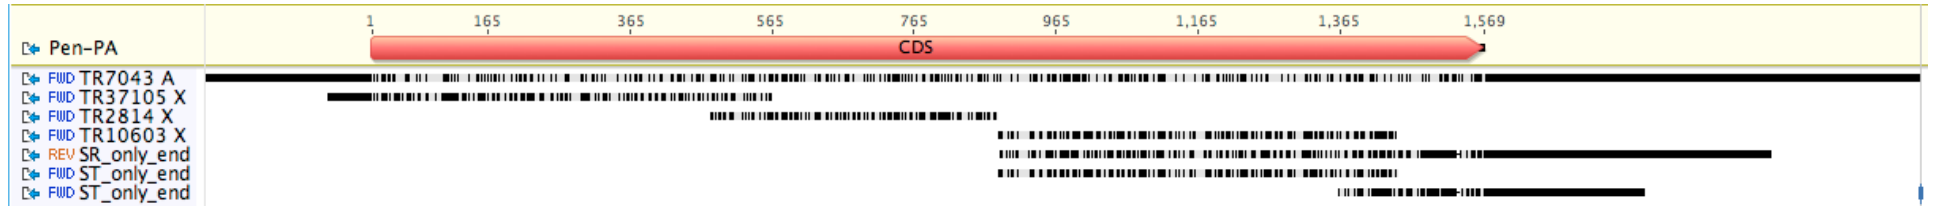

Figure S3. An alignment of the protein sequences of *importin-α2* and *X-importin-α2* in SR and ST. The protein domains are labeled, and the amino acids are coding according to similarity. Black represents identical residues, while white residues are the most different. The C-terminal end of the protein appears to be the most diverged between the autosomal and X-linked copies. The IBB domain binds to *importin-β*, ARM repeats 1 – 9 bind to the NLS signals of cargo, and ARM repeat 10 binds to the export factor. Panel A shows the entire protein sequence, and Panel B shows the protein sequence alignment zoomed in on the diverged C-terminus. The \* denotes the stop codon.

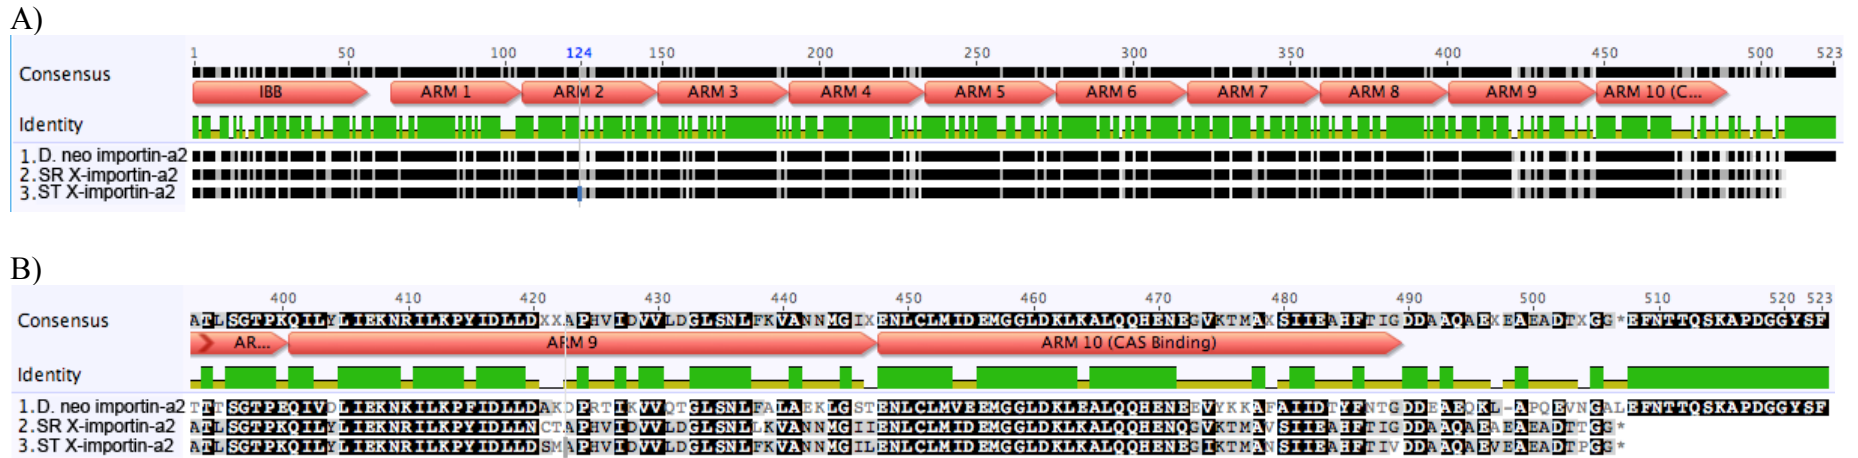

Figure S4. Box plot of divergence between SR and ST across loci between the top candidates and the non-candidate X-linked loci. Panel A shows  $K_{ST}$  and Panel B shows  $S_{nn}$ .

A)

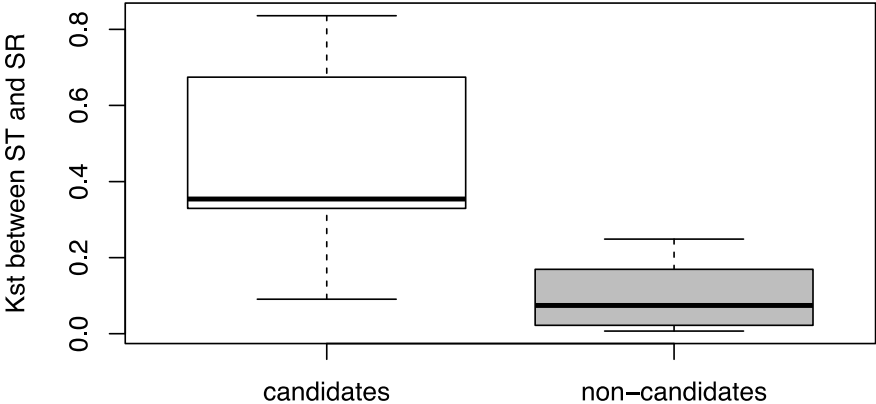

B)

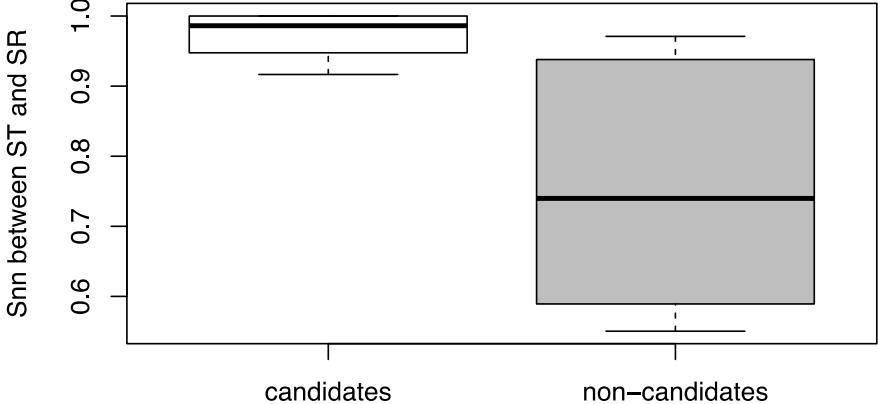







**Figure S5. Continued**

D) TR37304 – top candidate

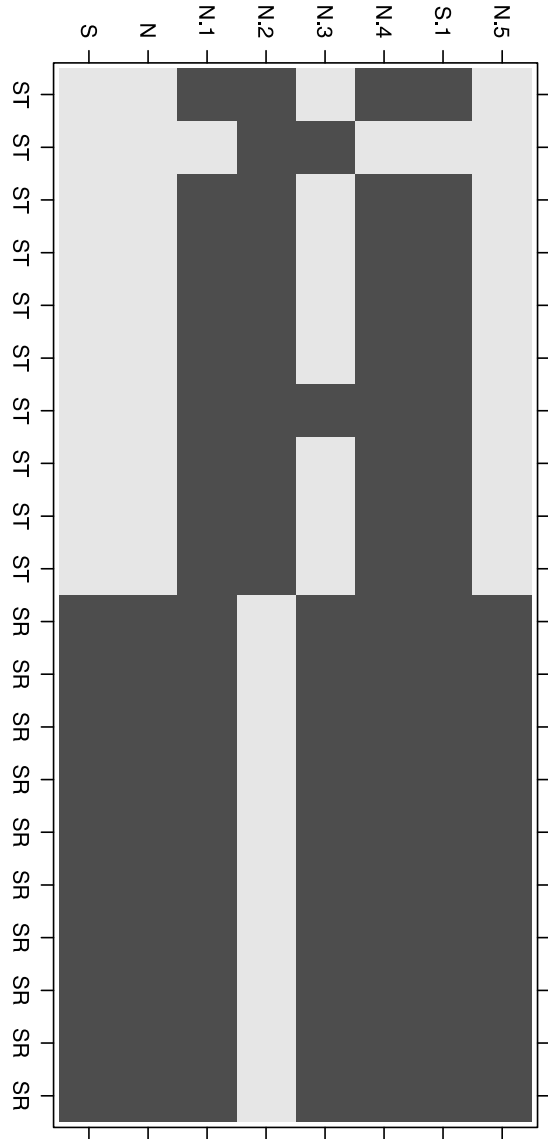



Figure S5. Continued

E) TR23125

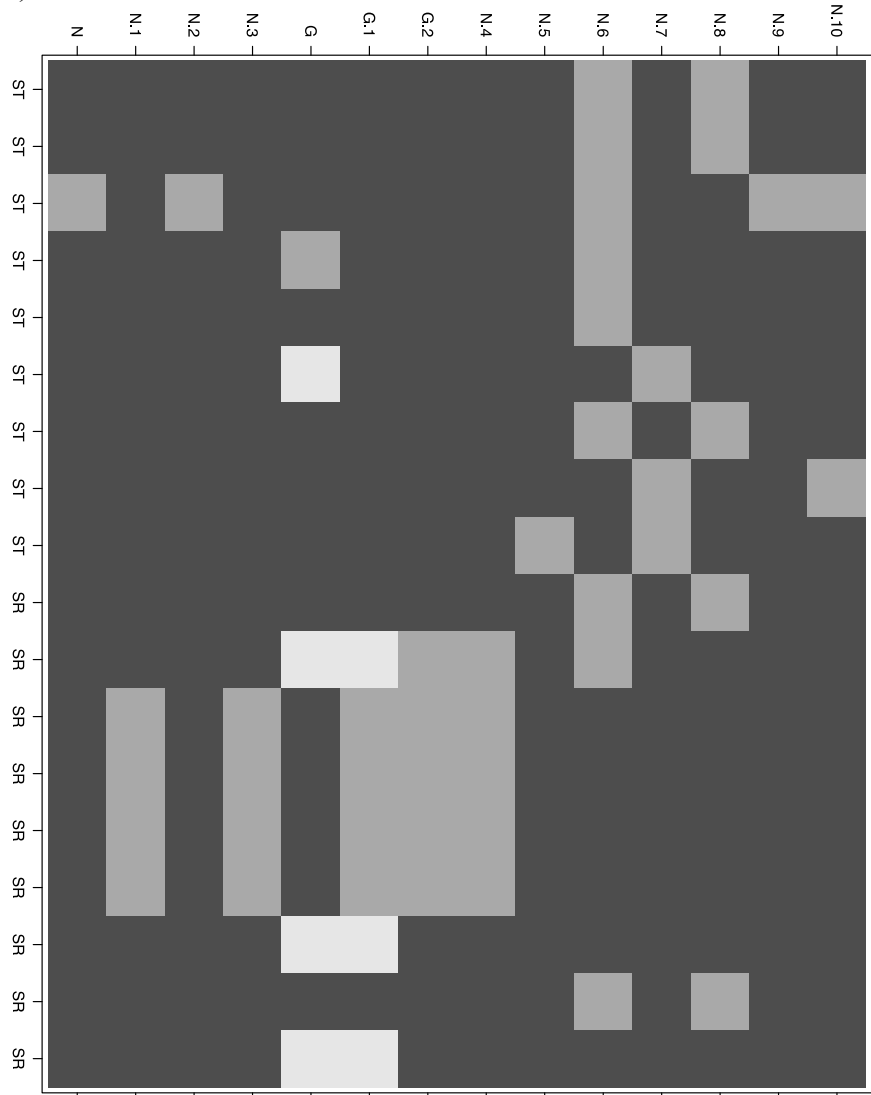

Figure S5. Continued

F) TR50351

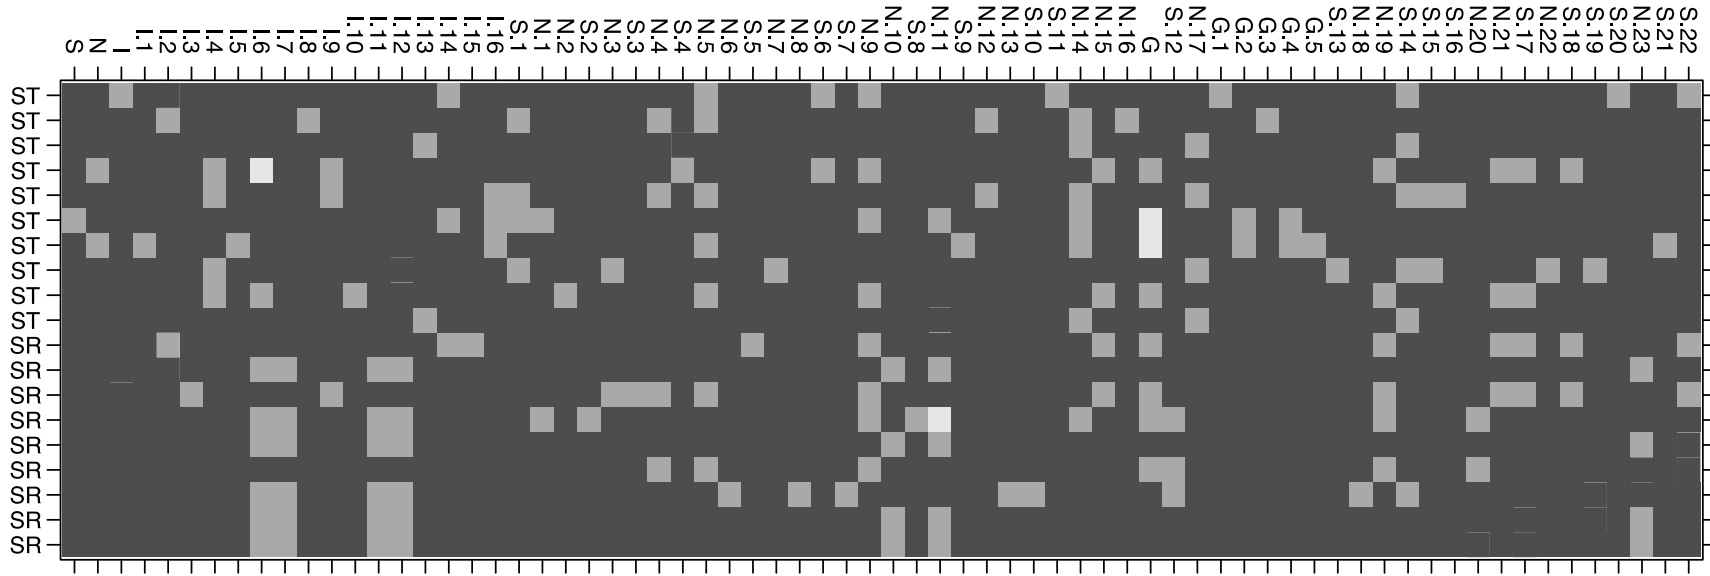

**Figure S6.** Part of the protein sequence of TR 261, showing a premature stop codon (\*) at residue 152 of the ST sample R12. The normal end of the transcript is at site 170.

|              | 120   | 130                       | 140                          | 150 | 160 | 170 |
|--------------|-------|---------------------------|------------------------------|-----|-----|-----|
| 1. A2_ST     | QWFR  | LFCDVNSFKVPHGYEPIAARSGLPI | CIGASPFKKMTKNFEISKTEEINNFDNI | *   |     |     |
| 2. A4_ST     | QWFR  | LFCDVNSFKVPHGYEPIAARSGLPI | CIGASPFKKMTKNFEISKTEEINNFDNI | *   |     |     |
| 3. B11_ST    | QWFR  | LFCDVNSFKVPHGYEPIAARSGLPI | CIGASPFKKMTKNFEISKTEEINNFDNI | *   |     |     |
| 4. C7_ST     | QWFR  | LFCDVNSFKVPHGYEPIAARSGLPI | CIGASPFKKMTKNFEISKTEEINNFDNI | *   |     |     |
| 5. D2_ST     | QWFR  | LFCDVNSFKVPHGYEPIAARSGLPI | CIGASPFKKMTKNFEISKTEEINNFDNI | *   |     |     |
| 6. L3_ST     | QWFR  | LFCDVNSFKVPCGYNPIAARSGLPI | CIGASPFKKMTKNFEISKTEEINNFDNI | *   |     |     |
| 7. N2_ST     | QWFR  | LFCDVNSFKVPHGYKPIEARSGLPI | CIGASPFKKNEKNFKISKTEEINNFDNI | *   |     |     |
| 8. N4_ST     | QWFR  | LFCDVNSFKVPCGYNPIAARSGLPI | CIGASPFKKMTKNFEISKTEEINNFDNI | *   |     |     |
| 9. R12_ST    | QWFR  | LFCDVNSFKVPHGYKPIEARSGLPI | CIGASPFKKN*KNFEISKTEEINNFDNI | *   |     |     |
| 10. ST_lab   | QWFR  | LFCDVNSFKVPCGYNPIAARSGLPI | CIGASPFKKMTKNFEISKTEEINNFDNI | *   |     |     |
| 11. A27_SR   | QWFR  | LFCDVNSFKVPCGYNPIAARSGLPI | CIGASPFKKMTKNFEISKTEEINNFDNI | *   |     |     |
| 12. B29_SR   | QWFR  | LFCDVNSFKVPCGYNPIAARSGLPI | CIGASPFKKMTKNFEISKTEEINNFDNI | *   |     |     |
| 13. C3_SR    | QWFR  | LFCDVNSFKVPCGYNPIAARSGLPI | CIGASPFKKNEKNFEISKTEEINNFDNI | *   |     |     |
| 14. C6_SR    | QWFR  | LFCDVNSFKVPCGYNPIAARSGLPI | CIGASPFKKNEKNFEISKTEEINNFDNI | *   |     |     |
| 15. C27_SR   | QWFR  | LFCDVNSFKVPHGYKPIAARSGLPI | CIGASPFKKNEKNFEISKTEEINNFDNI | *   |     |     |
| 16. D8_SR    | QWFR  | LFCDVNSFKVPHGYKPIAARSGLPI | CIGASPFKKNEKNFEISKTEEINNFDNI | *   |     |     |
| 17. K27_SR   | QWFR  | LFCDVNSFKVPHGYKPIAARSGLPI | CIGASPFKKNEKNFEISKTEEINNFDNI | *   |     |     |
| 18. N5_SR    | QWFR  | LFCDVNSFKVPCGYNPIAARSGLPI | CIGASPFKKNEKNFEISKTEEINNFDNI | *   |     |     |
| 19. TR261    | QWFR  | LFCDVNSFKVPCGYNPIAARSGLPI | CIGASPFKKMTKNFEISKTEEINNFDNI | *   |     |     |
| ▼ TR261.gff3 | ▶ CDS |                           |                              |     |     |     |

**Figure S7.** Box plot of Tajima's D for the top candidates (TC) and non-candidates (NC) on ST and SR and the autosomes (A). Panel A on the left was calculated using only non-coding and synonymous variation. Panel B on the right was calculated using only nonsynonymous variation.

A)

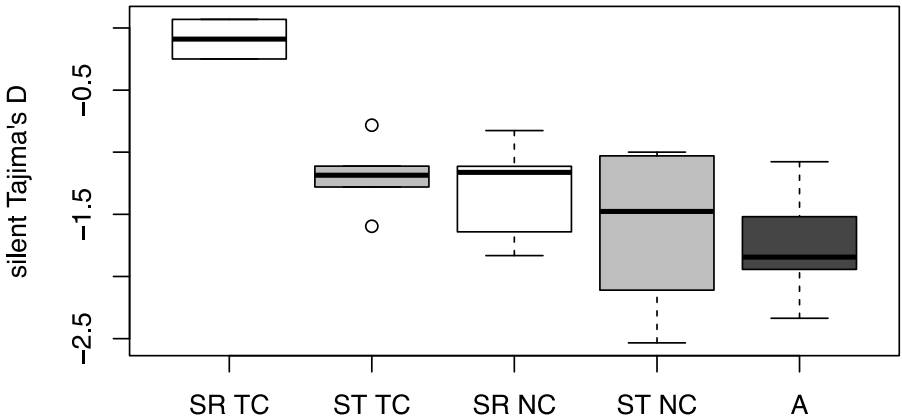

B)

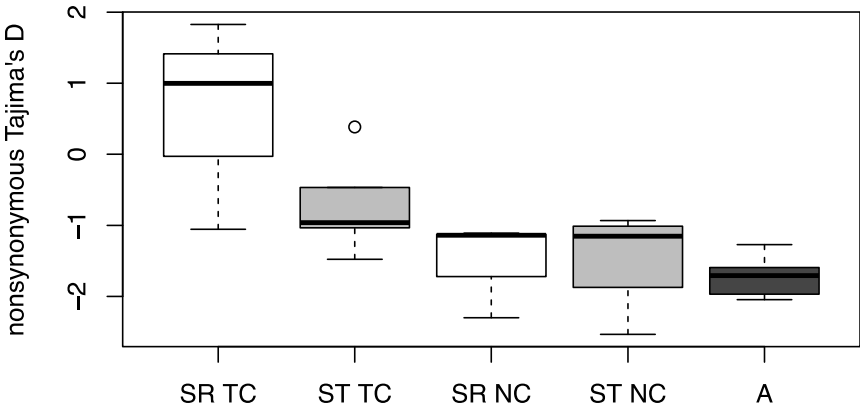

**Figure S8.** An alignment of the genomic sequence of *importin- $\alpha$ 2* in *D. melanogaster*, the transcript sequence of *X-importin- $\alpha$ 2* in ST *D. neotestacea*, and the genomic sequence of *X-importin- $\alpha$ 2* in *D. neotestacea*. The *D. melanogaster* sequence contains the entire open reading frame, from start to stop. Note the *X-importin- $\alpha$ 2* transcript ends short of the *D. melanogaster* transcript. The ORFs of the genomic sequence of *X-importin- $\alpha$ 2* are annotated as yellow arrows along the transcript, and the intron is marked in blue. There are two introns in *D. melanogaster* genomic sequence that are not present in the *D. neotestacea* *X-importin- $\alpha$ 2* genomic sequence, which are marked with red arrows.

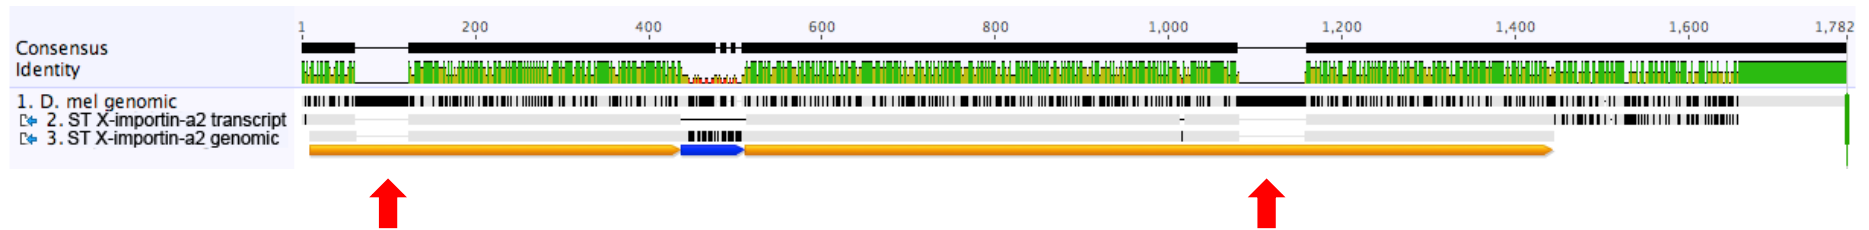

**Table S1.** The original genomic locations of the transcripts with sequence differences between ST and SR. The locations were assigned via homology with *D. melanogaster* and *D. virilis*. All transcripts with sequence differences were reassigned to the X-chromosome for downstream differential expression analyses.

| <b>Chromosome</b> | <b>Total N transcripts</b> | <b>N transcripts with sequence difference SR vs ST</b> | <b>Proportion with a sequence difference SR vs ST</b> |
|-------------------|----------------------------|--------------------------------------------------------|-------------------------------------------------------|
| X (A)             | 2748                       | 1067                                                   | 0.3883                                                |
| B                 | 3372                       | 12                                                     | 0.0036                                                |
| C                 | 3488                       | 9                                                      | 0.0026                                                |
| D                 | 3444                       | 4                                                      | 0.0012                                                |
| E                 | 4319                       | 7                                                      | 0.0016                                                |
| F                 | 119                        | 0                                                      | 0                                                     |
| mtDNA             | 29                         | 0                                                      | 0                                                     |
| Unknown           | 7948                       | 250                                                    | 0.0315                                                |

**Table S2.** Forward and reverse PCR primers.

| <b>Transcript</b>                      | <b>Forward 5' – 3'</b>    | <b>Reverse 5' – 3'</b> |
|----------------------------------------|---------------------------|------------------------|
| TR261                                  | GCAAATACACGAGCACCAACA     | TGTCAGGAGAAGGTGAGATGG  |
| TR1778                                 | ACAAAACCCCTCGTCATCCC      | GCGGCTCTTTGCTTTTTGGA   |
| TR5481                                 | TGAGAGCGACGCATTGACTT      | GATTTCTGAAGCCCCGACCA   |
| TR6297                                 | CCCATTCCAAGTGGCAAAGC      | AGCTGACAGAACGTGCAGAA   |
| TR11103                                | CGATCCCCAGCATCATTCGA      | CACCAGTCCAAAGTTGCAGC   |
| TR23125                                | GACAAGGAAGGCGAACAGGA      | TGCTATTGATGCGCTCCGAT   |
| TR24932                                | CCTTGTCGCCGTGAGTGTTA      | TGGGGAACAATTGAAAGCGC   |
| TR37304                                | CCGGGTGCAATAATTGAGCG      | GCGGAAAATGGCACTGGTTT   |
| TR50351                                | TTGAAGTGGCAATCCCGGAA      | GATCAACGTTACTGCGTCGC   |
| <i>X-importin-<math>\alpha</math>2</i> | AACATCAGGAAAGAAAAGCATAACT | CCCAGCTGGTCAGATGTTGT   |
| <i>importin-<math>\alpha</math>2</i>   | GCTCGCCCATATACAGCTAAAG    | GCTGGGCAGGTGTGTGTTAT   |

**Table S3.** Candidates for which population genetic patterns were investigated. The first six transcripts had  $K_a/K_s > 1$ , were expressed only in the testes, and were differentially expressed between ST and SR. The latter four transcripts had  $K_a/K_s$  values suggestive of positive selection but did not otherwise meet the candidacy criteria.  $K_a/K_s$  was calculated between ST and SR. Mean expression level,  $\log_2$  fold change between ST and SR, and FDR corrected p-value were calculated in DESeq2. Loci selected as top candidates following evolutionary analyses are marked.

| Top candidate ? | transcript | $K_a$ | $K_s$ | $K_a/K_s$ | Length | Subs | S Subs | N Subs | Testes Mean Expression | $\log_2$ Fold Change | padj  | % difference | Carcass Mean Expression | annotation           |
|-----------------|------------|-------|-------|-----------|--------|------|--------|--------|------------------------|----------------------|-------|--------------|-------------------------|----------------------|
| Yes             | TR10603    | 0.025 | 0.021 | 1.183     | 558    | 13   | 2.789  | 10.211 | 464.581                | 0.767                | 0     | 2.326        | 0.468                   | <i>X-importin-a2</i> |
| Yes             | TR2814     | 0.018 | 0.017 | 1.048     | 399    | 7    | 2.072  | 4.928  | 585.588                | 0.911                | 0     | 1.737        | 1.014                   | <i>X-importin-a2</i> |
| No              | TR23125    | 0.012 | 0.01  | 1.29      | 609    | 7    | 1.527  | 5.473  | 420.433                | 2.638                | 0     | 1.149        | 1.046                   | l(1)1Bi              |
| Yes             | TR24932    | 0.019 | 0.007 | 2.694     | 357    | 5    | 0.792  | 4.208  | 208.266                | -1.22                | 0     | 0.772        | 1.578                   | none                 |
| No              | TR6297     | 0.008 | 0.008 | 1.012     | 510    | 4    | 0.998  | 3.002  | 514.679                | 1.188                | 0     | 0.67         | 0.718                   | CG7366               |
| No              | TR5481     | 0.013 | 0.002 | 8.283     | 1137   | 10   | 0.521  | 9.479  | 426.12                 | -0.873               | 0     | 0.876        | 0.718                   | none                 |
| Yes             | TR261      | 0.02  | 0     | 50        | 522    | 8    | 0.05   | 7.95   | 911.2                  | -0.613               | 0     | 0.936        | 6.488                   | CG32371              |
| Yes             | TR11103    | 0.008 | 0.004 | 2.124     | 1224   | 8    | 1.306  | 6.694  | 508.192                | -0.036               | 0.949 | 0.671        | 11.376                  | CG2685               |
| Yes             | TR37304    | 0.006 | 0.004 | 1.565     | 1371   | 8    | 1.44   | 6.56   | 3140.84                | -0.427               | 0.001 | 0.593        | 16.864                  | CG4198               |
| No              | TR50351    | 0.013 | 0.011 | 1.201     | 678    | 8    | 1.699  | 6.301  | 742.04                 | -0.346               | 0.1   | 1.261        | 2.655                   | CG15452              |



**Table S4.** The transcripts from canonical *importin- $\alpha$*  genes and *X-importin- $\alpha 2$*  in *D. neotestacea*. Mean expression level, log<sub>2</sub> fold change between ST and SR, and FDR corrected p-value was calculated in DESeq2.

| Gene                   | Transcript | Mean Expression | Log <sub>2</sub> Fold Change | Adjusted P-value | Chromosome | Carcass Mean Expression | % difference | K <sub>a</sub> /K <sub>s</sub> | Substitutions | Length |
|------------------------|------------|-----------------|------------------------------|------------------|------------|-------------------------|--------------|--------------------------------|---------------|--------|
| importin- $\alpha 1$   | TR22571    | 5769.290        | 0.177                        | 0.534            | D          | 29.387                  | 0.000        | 0.000                          | 0.000         | 1655   |
| importin- $\alpha 3$   | TR6773     | 2018.999        | 0.134                        | 0.482            | E          | 49.905                  | 0.000        | 0.000                          | 0.000         | 1542   |
| importin- $\alpha 2$   | TR7043     | 52604.270       | -0.081                       | 0.668            | B          | 136.289                 | 0.000        | 0.000                          | 0.000         | 1569   |
| X-importin- $\alpha 2$ | TR37105    | 1149.714        | 0.450                        | 0.013            | X          | 1.514                   | 1.923        | 0.349                          | 12.000        | 624    |
| X-importin- $\alpha 2$ | TR10603    | 464.581         | 0.767                        | 0.000            | X          | 0.468                   | 2.326        | 1.183                          | 13.000        | 559    |
| X-importin- $\alpha 2$ | TR2814     | 585.588         | 0.911                        | 0.000            | X          | 1.014                   | 1.737        | 1.048                          | 7.000         | 403    |

**Table S5.** The population origin of males used in for the population genetic analysis. Not all individual samples were sequenced at every locus.

| <b>Population</b> | <b>Collection location</b> | <b>SR samples</b> | <b>ST samples</b> |
|-------------------|----------------------------|-------------------|-------------------|
| AB3               | Jasper, AB                 | 2                 | 0                 |
| BC                | Vancouver, BC              | 1                 | 2                 |
| ID                | Coeur d'Alene, ID          | 1                 | 4                 |
| MB                | The Pas, MB                | 0                 | 1                 |
| MN                | Bemidji, MN                | 1                 | 2                 |
| MT1               | Columbia Falls, MT         | 0                 | 2                 |
| MT2               | St. Regis, MT              | 2                 | 3                 |
| ND                | Minot, ND                  | 0                 | 1                 |
| OR                | MacKenzie Bridge, OR       | 3                 | 1                 |
| PEI               | Charlottetown, PEI         | 0                 | 1                 |

**Table S6.** Molecular population genetic summary statistics for each locus. Statistics for *D. neotestacea* samples. S (segregating sites) for total and silent sites is presented. M (mutations),  $\pi$ ,  $\theta$ , and D for silent sites only includes synonymous sites in open reading frames and all noncoding sites.  $\pi$  NS is using nonsynonymous polymorphism only.  $\rho$  is population recombination rate ( $2N_e r$ ) divided by the number of nucleotides in the marker. For the autosomal markers, all statistics were calculated from the combined set of SR and ST individuals.  $\rho$  and ZnS could not be calculated for some markers due to a lack of segregating sites. Bolded D values are less than the expected D in 95% of 10,000 simulations. Da is percent divergence between ST and SR. See also (Pieper and Dyer 2016).

| Region/<br>Marker | SR or<br>ST | N  | Total<br>sites | S   | Silent<br>sites | M<br>silent | S<br>silent | $\pi$<br>silent | $\pi$ NS | $\theta$<br>silent | D silent      | $\rho$ | ZnS   | $\pi_a/\pi_s$ | $K_a/K_s$ | Da     |
|-------------------|-------------|----|----------------|-----|-----------------|-------------|-------------|-----------------|----------|--------------------|---------------|--------|-------|---------------|-----------|--------|
| <b>X-linked</b>   |             |    |                |     |                 |             |             |                 |          |                    |               |        |       |               |           |        |
| <i>marf</i>       | ST          | 57 | 1063           | 186 | 670.34          | 206         | 184         | 0.043           | 0.005    | 0.067              | -0.999        | 0.122  | 0.037 | 0.195         | 0.424     | 1.581  |
|                   | SR          | 48 |                | 73  | 844.49          | 74          | 71          | 0.009           | 0.001    | 0.020              | <b>-1.832</b> | 0.008  | 0.252 | 0.577         | 0.282     |        |
| <i>mof</i>        | ST          | 65 | 576            | 30  | 128.36          | 26          | 26          | 0.009           | 0.000    | 0.043              | <b>-2.533</b> | 0.000  | 0.041 | 0.044         | 0.065     | 0.002  |
|                   | SR          | 47 |                | 7   | 128.34          | 6           | 6           | 0.004           | 0.000    | 0.011              | <b>-1.641</b> | 0.000  | 0.049 | 0.038         | 0.064     |        |
| <i>pgd</i>        | ST          | 56 | 569            | 38  | 128.98          | 30          | 28          | 0.026           | 0.002    | 0.051              | <b>-1.476</b> | 0.146  | 0.023 | 0.064         | 0.069     | -0.010 |
|                   | SR          | 43 |                | 18  | 127.7           | 9           | 9           | 0.012           | 0.001    | 0.016              | <b>-0.826</b> | 0.000  | 0.284 | 0.092         | 0.068     |        |
| <i>rpl</i>        | ST          | 57 | 302            | 11  | 123.33          | 11          | 11          | 0.005           | 0.000    | 0.019              | <b>-2.109</b> | 0.024  | 0.051 | 0.00          | 0.00      | 0.008  |
|                   | SR          | 44 |                | 4   | 123.33          | 4           | 4           | 0.004           | 0.000    | 0.007              | -1.162        | 0.066  | 0.004 | 0.00          | 0.000     |        |
| <i>spk</i>        | ST          | 56 | 382            | 13  | 81.17           | 12          | 12          | 0.021           | 0.000    | 0.032              | -1.029        | 0.298  | 0.015 | 0.006         | 0.021     | 0.041  |
|                   | SR          | 45 |                | 1   | 81.17           | 1           | 1           | 0.001           | 0.000    | 0.003              | -1.113        | NA     | NA    | 0.00          | 0.022     |        |
| <b>Autosomal</b>  |             |    |                |     |                 |             |             |                 |          |                    |               |        |       |               |           |        |
| <i>esc</i>        |             | 82 | 370            | 29  | 78.32           | 29          | 27          | 0.025           | 0.001    | 0.074              | <b>-1.956</b> | 0.130  | 0.023 | 0.020         | 0.002     |        |
| <i>gl</i>         |             | 80 | 402            | 52  | 96.96           | 42          | 39          | 0.035           | 0.002    | 0.087              | <b>-1.843</b> | 0.065  | 0.023 | 0.060         | 0.059     |        |
| <i>mago</i>       |             | 78 | 324            | 14  | 57.15           | 7           | 7           | 0.010           | 0.001    | 0.025              | <b>-1.429</b> | 0.086  | 0.058 | 0.109         | 0.500     |        |
| <i>ntid</i>       |             | 88 | 527            | 50  | 123.42          | 44          | 41          | 0.033           | 0.003    | 0.071              | <b>-1.575</b> | 0.068  | 0.027 | 0.138         | 0.110     |        |
| <i>sia</i>        |             | 82 | 400            | 13  | 96.33           | 14          | 13          | 0.004           | 0.000    | 0.029              | <b>-2.336</b> | 0.000  | 0.015 | 0.024         | 0.084     |        |
| <i>tpi</i>        |             | 80 | 347            | 33  | 83.28           | 29          | 29          | 0.044           | 0.001    | 0.070              | -1.011        | 0.245  | 0.043 | 0.00          | 0.000     |        |
| <i>wee</i>        |             | 84 | 285            | 14  | 58.14           | 10          | 10          | 0.015           | 0.001    | 0.034              | <b>-1.462</b> | 0.561  | 0.027 | 0.048         | 0.003     |        |

**Table S7.** Data used for the HKA tests. The first set of data is for SR, and the second set is for ST. Divergence is measured between ST and SR. S is the number of segregating sites, N is the number of samples, and divergence is measured between ST and SR. The scalar was calculated as  $0.75 \times 0.15$  for SR and  $0.75 \times 0.85$  for ST. Top candidates are noted with TC.

| SR or ST | TC? | Marker            | Length | S   | N  | Divergence | Theta   | Scalar |
|----------|-----|-------------------|--------|-----|----|------------|---------|--------|
| SR       | TC  | x-imp- $\alpha$ 2 | 1905   | 8   | 9  | 43.139     | 0.00148 | 0.1125 |
|          | TC  | TR261             | 627    | 10  | 8  | 12.25      | 0.00631 | 0.1125 |
|          | TC  | TR11103           | 826    | 0   | 10 | 4.556      | 0.00001 | 0.1125 |
|          | TC  | TR23125           | 343    | 6   | 10 | 4.167      | 0.00618 | 0.1125 |
|          | TC  | TR24932           | 280    | 1   | 8  | 7.234      | 0.00138 | 0.1125 |
|          | TC  | TR37304           | 770    | 0   | 10 | 5.1        | 0.00001 | 0.1125 |
|          | TC  | TR50351           | 649    | 37  | 9  | 16.522     | 0.0207  | 0.1125 |
|          | no  | <i>marf</i>       | 788    | 54  | 46 | 29.996     | 0.01779 | 0.1125 |
|          | no  | <i>mof</i>        | 576    | 7   | 47 | 0.889      | 0.00275 | 0.1125 |
|          | no  | <i>pgd</i>        | 565    | 18  | 42 | 4.356      | 0.0074  | 0.1125 |
|          | no  | <i>rpl</i>        | 302    | 4   | 44 | 0.565      | 0.00304 | 0.1125 |
|          | no  | <i>spk</i>        | 382    | 14  | 45 | 1.04       | 0.0006  | 0.1125 |
| ST       | TC  | x-imp- $\alpha$ 2 | 1905   | 142 | 12 | 43.139     | 0.02573 | 0.6375 |
|          | TC  | TR261             | 627    | 25  | 10 | 12.25      | 0.01527 | 0.6375 |
|          | TC  | TR11103           | 826    | 10  | 10 | 4.556      | 0.00713 | 0.6375 |
|          | TC  | TR23125           | 343    | 8   | 9  | 4.167      | 0.00843 | 0.6375 |
|          | TC  | TR24932           | 280    | 10  | 8  | 7.234      | 0.01717 | 0.6375 |
|          | TC  | TR37304           | 770    | 4   | 10 | 5.1        | 0.00184 | 0.6375 |
|          | TC  | TR50351           | 649    | 50  | 19 | 16.522     | 0.02832 | 0.6375 |
|          | no  | <i>marf</i>       | 788    | 186 | 57 | 29.996     | 0.05808 | 0.6375 |
|          | no  | <i>mof</i>        | 576    | 30  | 65 | 0.889      | 0.01098 | 0.6375 |
|          | no  | <i>pgd</i>        | 565    | 38  | 56 | 4.356      | 0.01541 | 0.6375 |
|          | no  | <i>rpl</i>        | 302    | 11  | 57 | 0.565      | 0.0079  | 0.6375 |
|          | no  | <i>spk</i>        | 382    | 13  | 56 | 1.04       | 0.00741 | 0.6375 |

**Table S8: See the associated excel file).** The results of a GO terms enrichment analysis for different sets of differentially expressed transcripts. Each spreadsheet indicates a different set of DE transcripts.
